# Supplementary material for: Preparation of thermally curable materials using lignin extracted from sawmill co-product
Source: Royal Society of Chemistry journal article supplement (doi:10.1039/d4su00767k), 2025-01-01
Supplement: d4su00767k1.pdf [file d4su00767k1.pdf]

## Supplementary Information

### Preparation of thermally curable materials using lignin extracted from sawmill co-product

Libby J. Marshall,<sup>a</sup> Daniel J. Cheney,<sup>b</sup> Jasmine A. Keith,<sup>b</sup> Christopher Kelly,<sup>a</sup> Frédéric Blanc,<sup>b, c, d</sup> Andrew J. West<sup>e,\*</sup> and Dave J. Adams<sup>a,\*</sup>

- a. School of Chemistry, University of Glasgow, Glasgow, G12 8QQ, UK
- b. Department of Chemistry, University of Liverpool, Liverpool, L69 7ZD, UK
- c. Stephenson Institute for Renewable Energy, University of Liverpool, Liverpool, L69 7ZF, UK
- d. Leverhulme Research Centre for Functional Materials Design, Materials Innovation Factory, University of Liverpool, Liverpool, L69 7ZD
- e. Sonichem, Unit C5a, Melton Commercial Park, Melton Mowbray, LE14 3JL, United Kingdom

\*Corresponding authors e-mail address: [andy@sonichem.com](mailto:andy@sonichem.com) and [dave.adams@glasgow.ac.uk](mailto:dave.adams@glasgow.ac.uk)

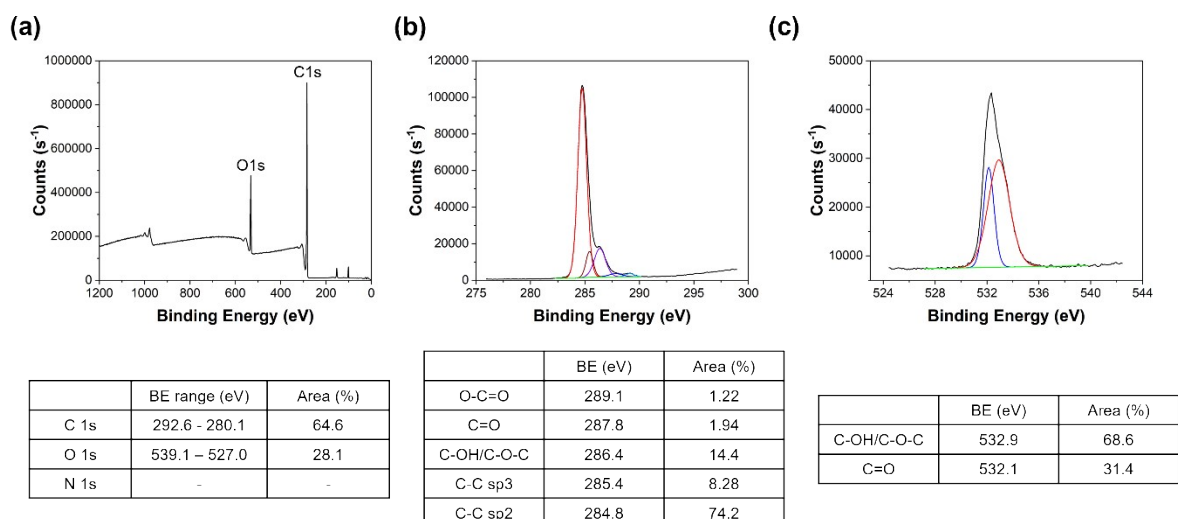

**Figure S1.** XPS spectra collected for unmodified Sonichem lignin: (a) survey spectrum; (b) C region with fits for C-C sp<sup>2</sup> (red), C-C sp<sup>3</sup> (dark red), C-OH/C-O-C (purple), O-C=O (light blue), C=O (blue); (c) O region with fits for C=O (blue) and C-OH/C-O-C (red). The background is

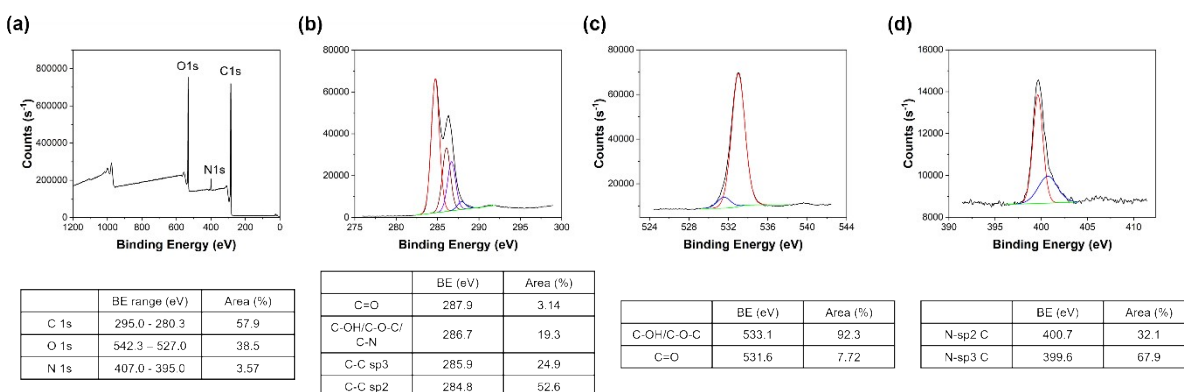

shown in green. The tables underneath each graph summarise the results from fitting the data.

**Figure S2.** XPS spectra collected for SL-BZ-aniline: (a) survey spectrum; (b) C region with fits for C-C sp<sup>2</sup> (red), C-C sp<sup>3</sup> (dark red), C-OH/C-O-C/C-N (purple), C=O (blue); (c) O region with fits for C=O (blue) and C-OH/C-O-C (red); (d) N region with fits for N-sp<sup>2</sup> C (red) and N-sp<sup>3</sup> C (blue). The background is shown in green. The tables underneath each graph

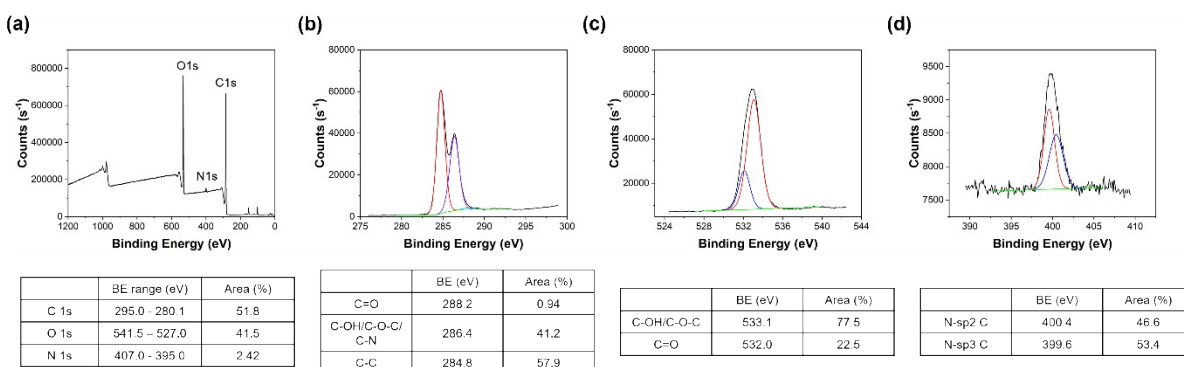

summarise the results from fitting the data.

**Figure S3.** XPS spectra collected for SL-BZ-A: (a) survey spectrum; (b) C region with fits for C-C sp<sup>2</sup> and sp<sup>3</sup> (red), C-OH/C-O-C/C-N (purple), C=O (blue); (c) O region with fits for C=O

(blue) and C-OH/C-O-C (red); (d) N region with fits for N-sp<sup>2</sup> C (red) and N-sp<sup>3</sup> C (blue). The background is shown in green. The tables underneath each graph summarise the results from

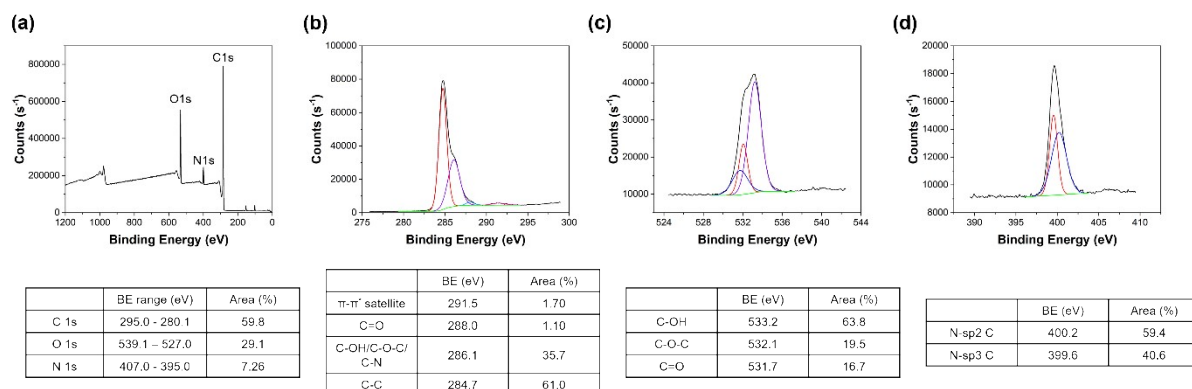

fitting the data.

**Figure S4.** XPS spectra collected for SL-BZ-B: (a) survey spectrum; (b) C region with fits for C-C sp<sup>2</sup> and sp<sup>3</sup> (red), C-OH/C-O-C/C-N (purple), C=O (blue),  $\pi$ - $\pi^*$  satellites (pink); (c) O region with fits for C=O (blue), C-OH (purple) and C-O-C (red); (d) N region with fits for N-sp<sup>2</sup> C (red) and N-sp<sup>3</sup> C (blue). The background is shown in green. The tables underneath each graph summarise the results from fitting the data.

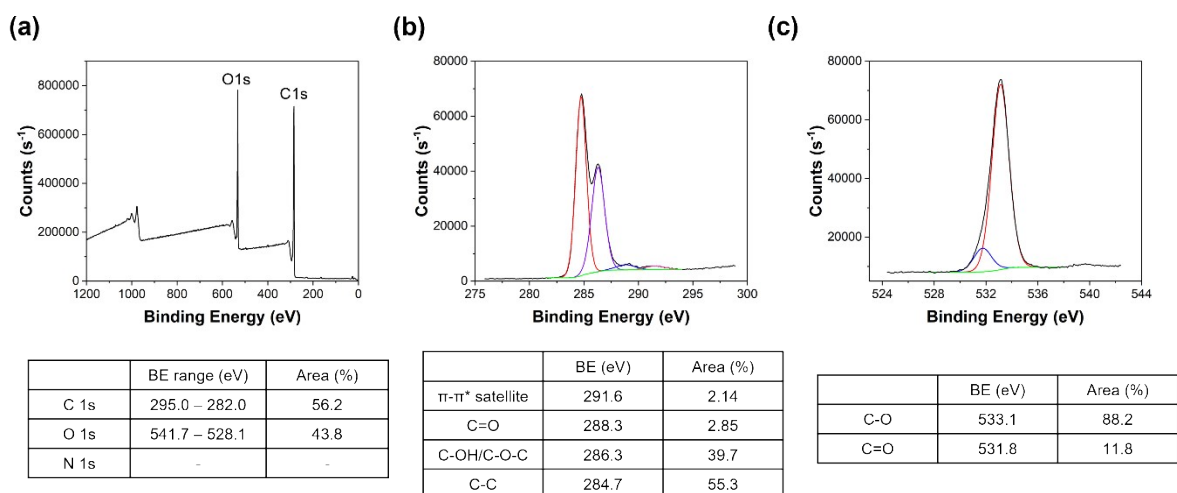

**Figure S5.** XPS spectra collected for KL: (a) survey spectrum; (b) C region with fits for C-C sp<sup>2</sup> and sp<sup>3</sup> (red), C-OH/C-O-C/C-N (purple), C=O (blue),  $\pi$ - $\pi^*$  satellites (pink); (c) O region with fits for C=O (blue) and C-OH/C-O-C (red). The background is shown in green. The tables underneath each graph summarise the results from fitting the data.

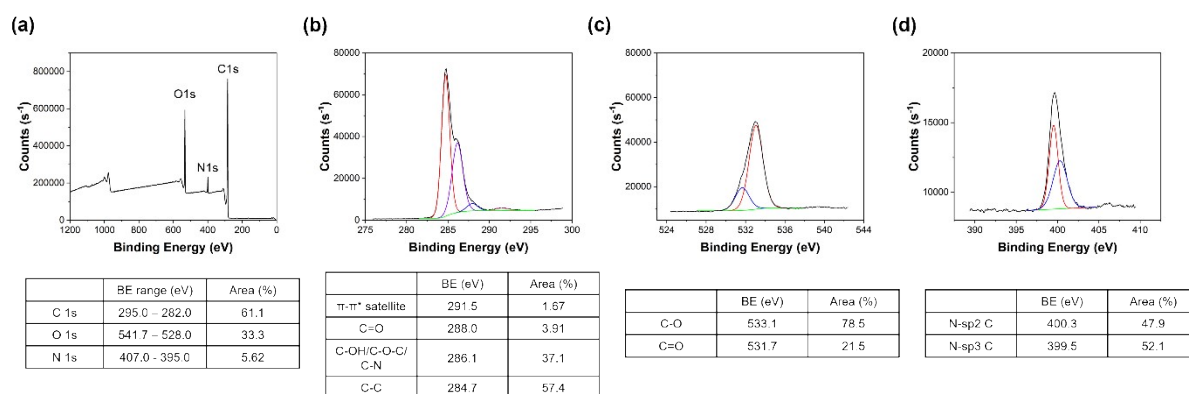

**Figure S6.** XPS spectra collected for KL-BZ-aniline: (a) survey spectrum; (b) C region with fits for C-C sp<sup>2</sup> and sp<sup>3</sup> (red), C-OH/C-O-C/C-N (purple), C=O (blue),  $\pi$ - $\pi^*$  satellites (pink); (c) O region with fits for C=O (blue), C-OH/C-O-C (red); (d) N region with fits for N-sp<sup>2</sup> C (red) and N-sp<sup>3</sup> C (blue). The background is shown in green. The tables underneath each graph summarise the results from fitting the data.

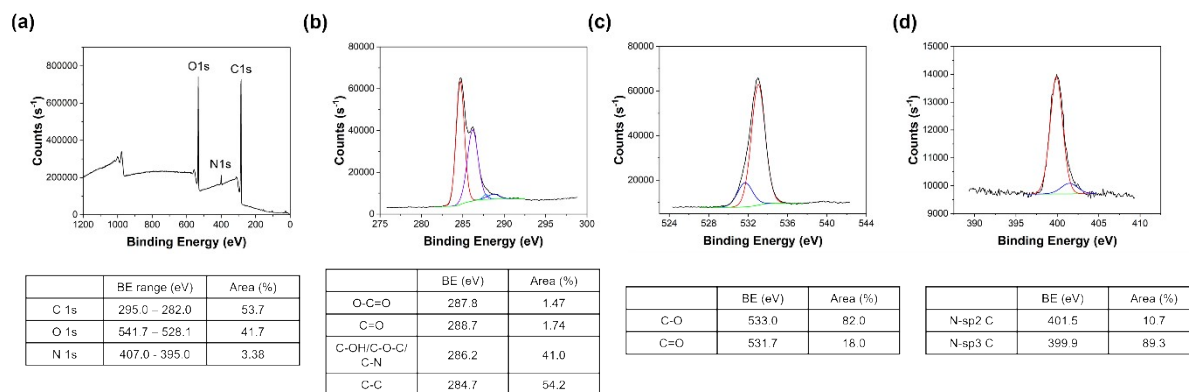

**Figure S7.** XPS spectra collected for KL-BZ-A: (a) survey spectrum; (b) C region with fits for C-C sp<sup>2</sup> and sp<sup>3</sup> (red), C-OH/C-O-C/C-N (purple), O-C=O (light blue), C=O (blue); (c) O region with fits for C=O (blue), C-OH/C-O-C (red); (d) N region with fits for N-sp<sup>2</sup> C (red) and N-sp<sup>3</sup> C (blue). The background is shown in green. The tables underneath each graph summarise the results from fitting the data.

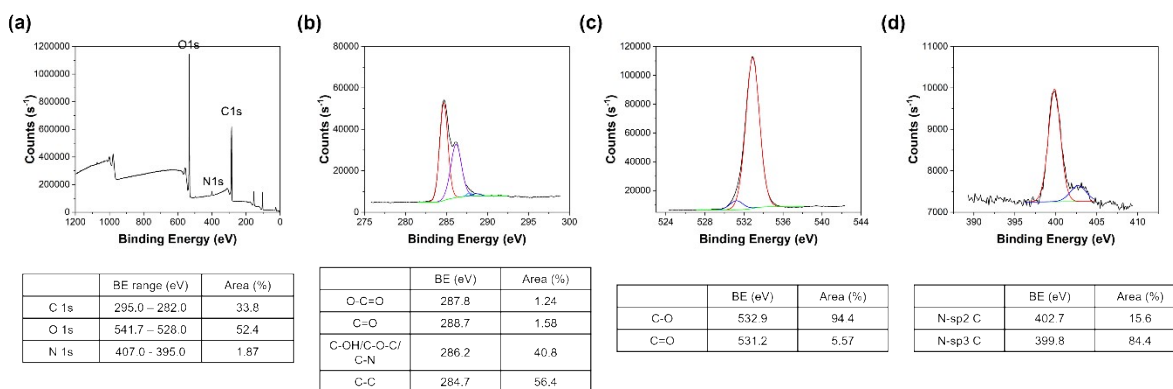

**Figure S8.** XPS spectra collected for KL-BZ-B: (a) survey spectrum; (b) C region with fits for C-C sp2 and sp3 (red), C-OH/C-O-C/C-N (purple), O-C=O (light blue), C=O (blue); (c) O region with fits for C=O (blue), C-OH/C-O-C (red); (d) N region with fits for N-sp2 C (red) and N-sp3 C (blue). The background is shown in green. The tables underneath each graph summarise

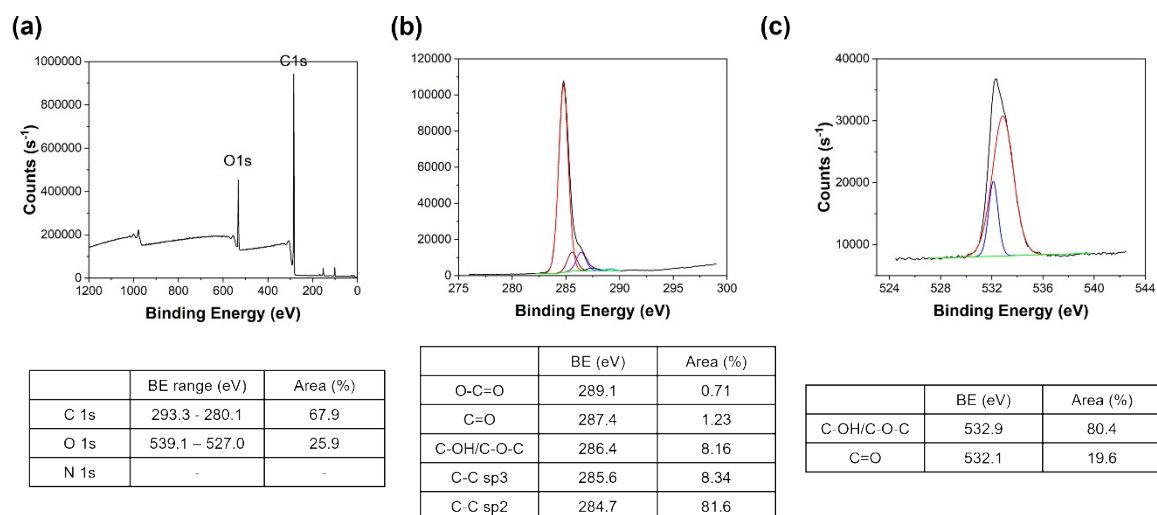

the results from fitting the data.

**Figure S9.** XPS spectra collected for SL-Ph: (a) survey spectrum; (b) C region with fits for C-C sp2 (red), C-C sp3 (dark red), C-OH/C-O-C (purple), O-C=O (light blue), C=O (blue); (c) O region with fits for C=O (blue) and C-OH/C-O-C (red). The tables underneath each graph summarise the results from fitting the data.

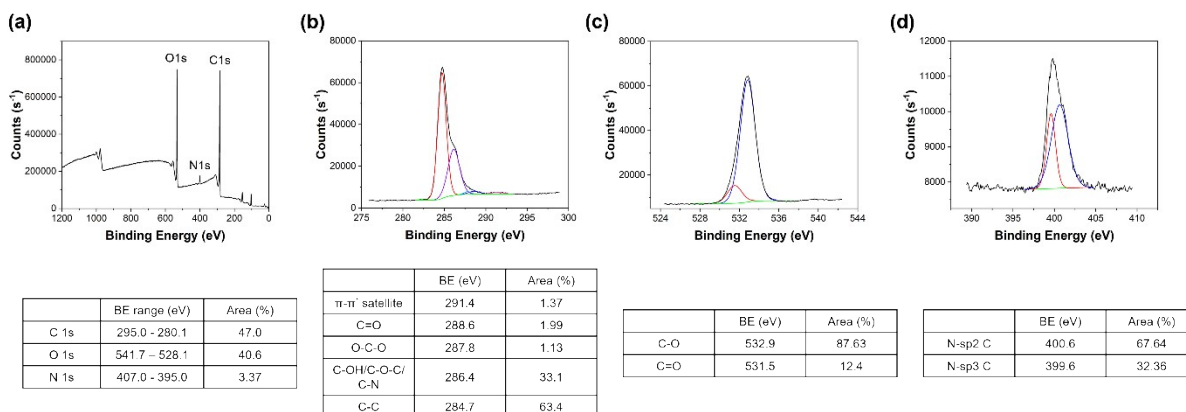

**Figure S10.** XPS spectra collected for SL-PhBZ-aniline: (a) survey spectrum; (b) C region with fits for C-C sp2 (red), C-C sp3 (dark red), C-OH/C-O-C/C-N (purple), O-C=O (light blue), C=O (blue), π-π\* satellites (pink); (c) O region with fits for C=O (blue), C-OH/C-O-C (red); (d) N

region with fits for N-sp2 C (red) and N-sp3 C (blue). The tables underneath each graph summarise the results from fitting the data.

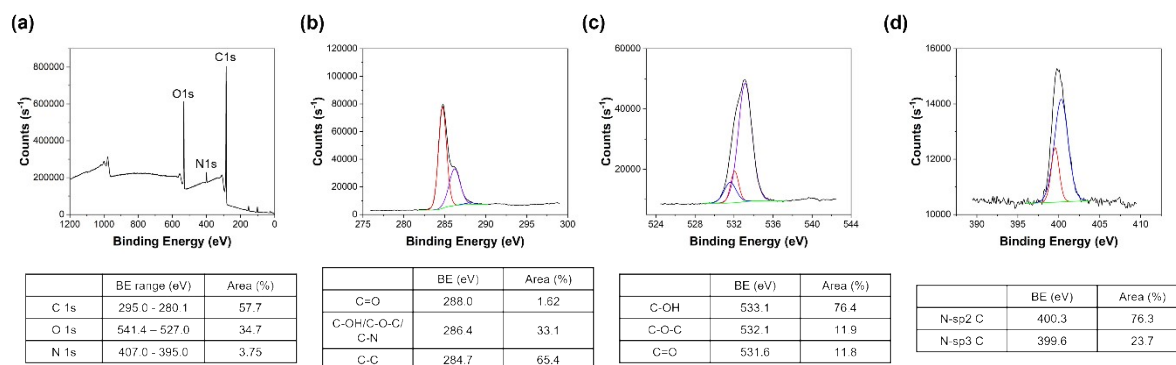

**Figure S11.** XPS spectra collected for SL-PhBZ-A: (a) survey spectrum; (b) C region with fits for C-C sp2 and sp3 (red), C-OH/C-O-C/C-N (purple), C=O (blue); (c) O region with fits for C=O (blue), C-OH (purple) and C-O-C (red); (d) N region with fits for N-sp2 C (red) and N-sp3 C (blue). The tables underneath each graph summarise the results from fitting the data.

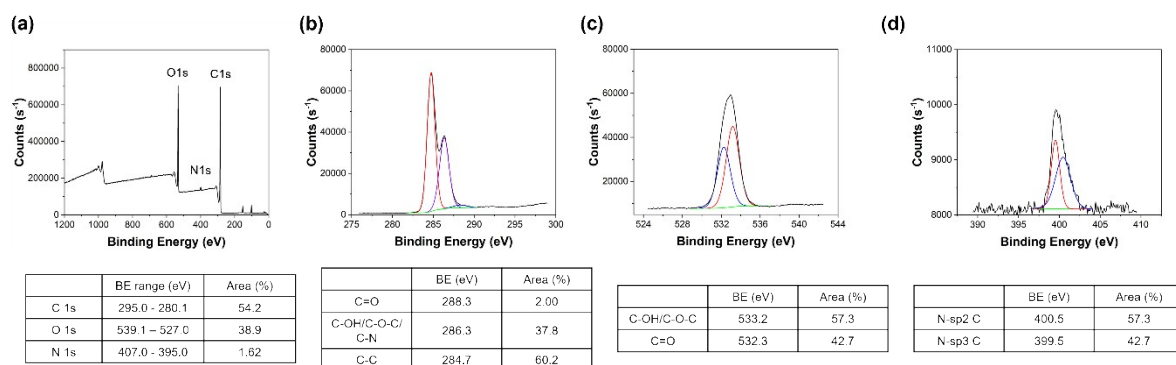

**Figure S12.** XPS spectra collected for SL-PhBZ-B: (a) survey spectrum; (b) C region with fits for C-C sp2 and sp3 (red), C-OH/C-O-C/C-N (purple), C=O (blue); (c) O region with fits for C=O (blue), C-O (red); (d) N region with fits for N-sp2 C (red) and N-sp3 C (blue). The background is shown in green. The tables underneath each graph summarise the results from fitting the data.

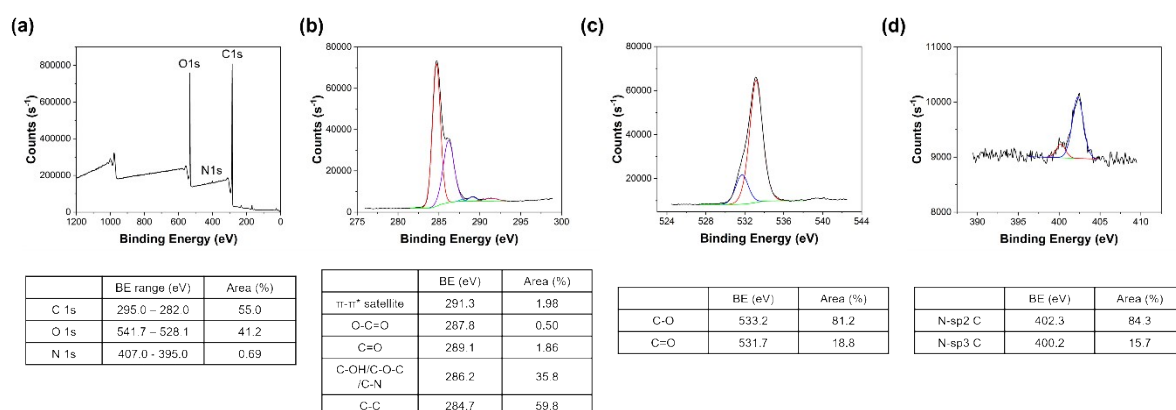

**Figure S13.** XPS spectra collected for KL-Ph: (a) survey spectrum; (b) C region with fits for C-C sp2 and sp3 (red), C-OH/C-O-C/C-N (purple), O-C=O (light blue), C=O (blue),  $\pi-\pi^*$  satellites (pink); (c) O region with fits for C=O (blue), C-OH/C-O-C (red); (d) N region with fits for N-sp2 C (red) and N-sp3 C (blue). The background is shown in green. The tables underneath each graph summarise the results from fitting the data.

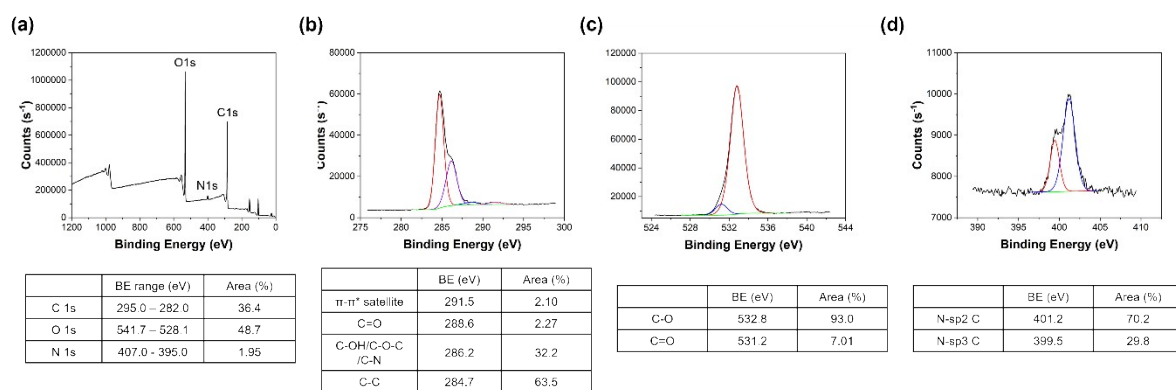

**Figure S14.** XPS spectra collected for KL-PhBZ-aniline: (a) survey spectrum; (b) C region with fits for C-C sp<sup>2</sup> and sp<sup>3</sup> (red), C-OH/C-O-C/C-N (purple), C=O (blue),  $\pi$ - $\pi^*$  satellites (pink); (c) O region with fits for C=O (blue), C-OH/C-O-C (red); (d) N region with fits for N-sp<sup>2</sup> C (red) and N-sp<sup>3</sup> C (blue). The background is shown in green. The tables underneath each graph summarise the results from fitting the data.

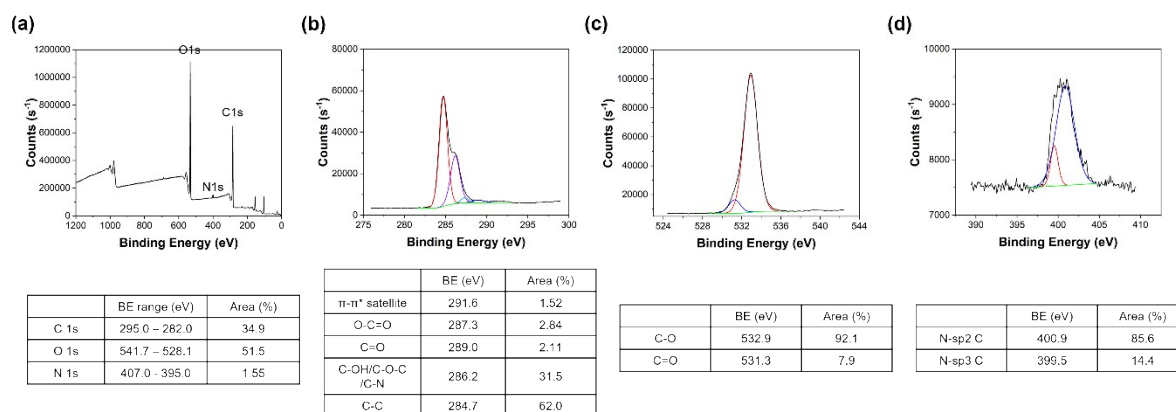

**Figure S15.** XPS spectra collected for KL-PhBZ-A: (a) survey spectrum; (b) C region with fits for C-C sp<sup>2</sup> and sp<sup>3</sup> (red), C-OH/C-O-C/C-N (purple), O-C=O (light blue), C=O (blue),  $\pi$ - $\pi^*$  satellites (pink); (c) O region with fits for C=O (blue), C-OH/C-O-C (red); (d) N region with fits for N-sp<sup>2</sup> C (red) and N-sp<sup>3</sup> C (blue). The background is shown in green. The tables underneath each graph summarise the results from fitting the data.

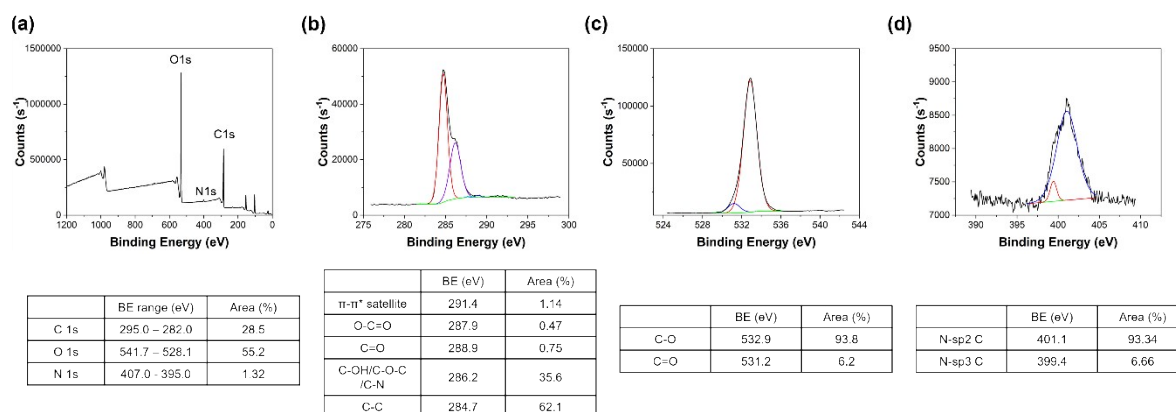

**Figure S16.** XPS spectra collected for KL-PhBZ-B: (a) survey spectrum; (b) C region with fits for C-C sp<sup>2</sup> and sp<sup>3</sup> (red), C-OH/C-O-C/C-N (purple), O-C=O (light blue), C=O (blue),  $\pi$ - $\pi^*$  satellites (pink); (c) O region with fits for C=O (blue), C-OH/C-O-C (red); (d) N region with fits for N-sp<sup>2</sup> C (red) and N-sp<sup>3</sup> C (blue). The background is shown in green. The tables underneath each graph summarise the results from fitting the data.

(a) SL

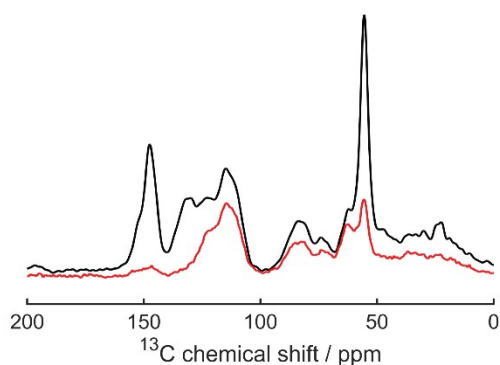

(b) SL-BZ-Aniline

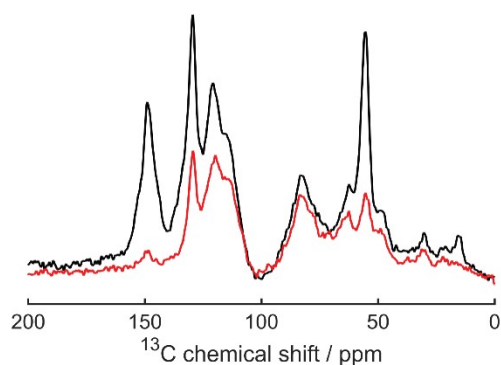

(c) SL-BZ-A

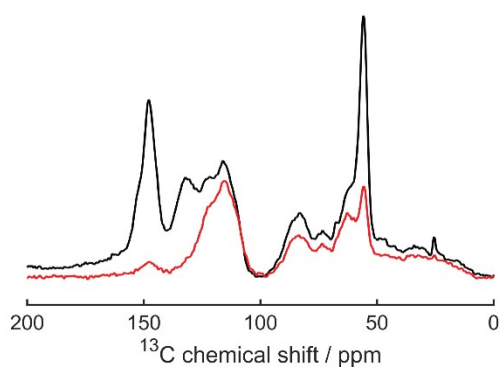

(d) SL-BZ-B

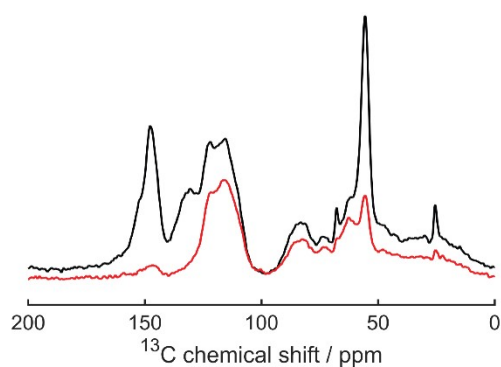

(e) SL-Ph

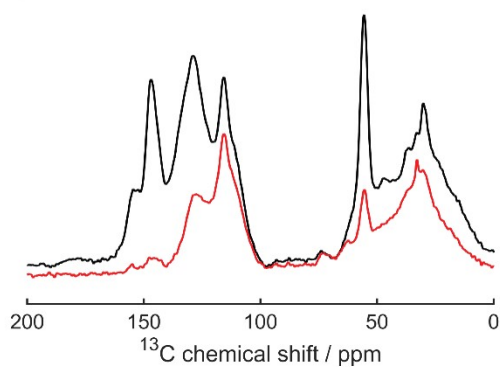

(f) SL-PhBZ-Aniline

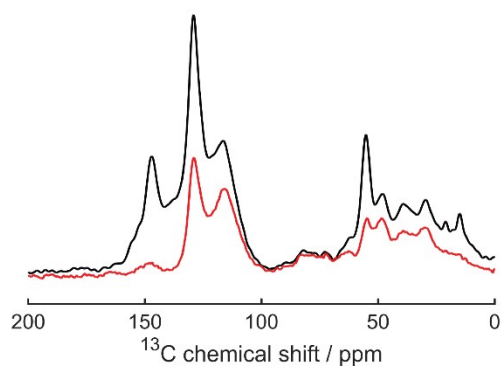

(g) SL-PhBZ-A

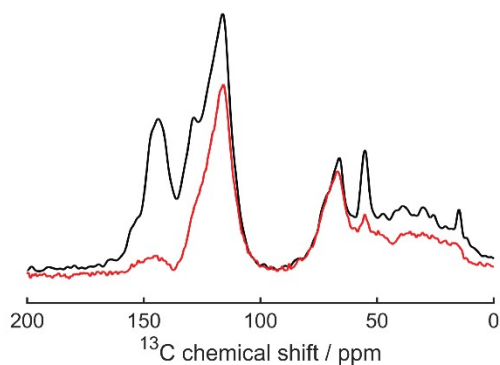

(h) SL-PhBZ-B

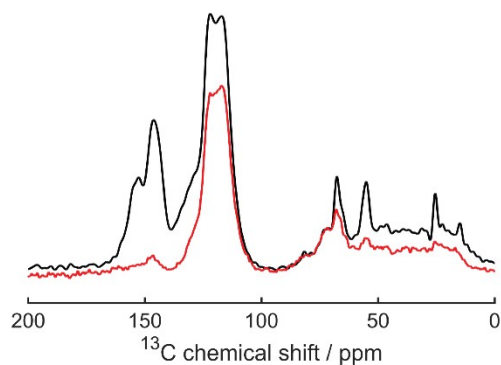

**Figure S17.**  $^{13}\text{C}$  CP MAS NMR spectra of Sonichem lignin, functionalised with phenol and/or benzoxazine, detected with a CP contact time of 1 ms (black) and 50  $\mu\text{s}$  (red).

(a) KL

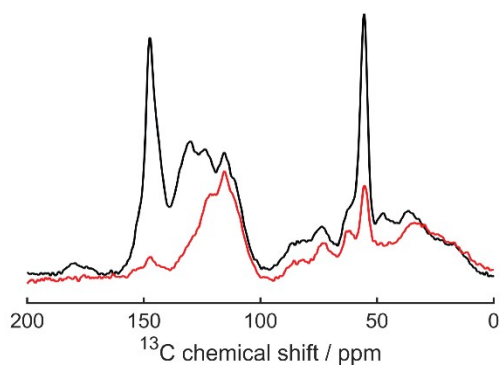

(b) KL-BZ-Aniline

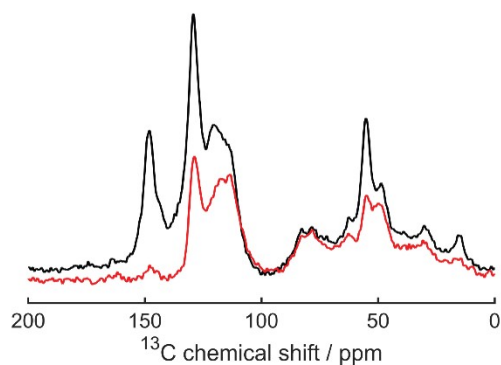

(c) KL-BZ-A

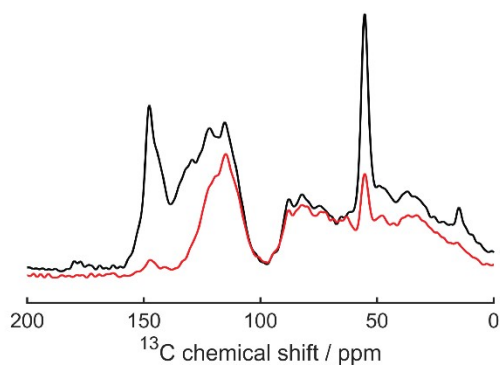

(d) KL-BZ-B

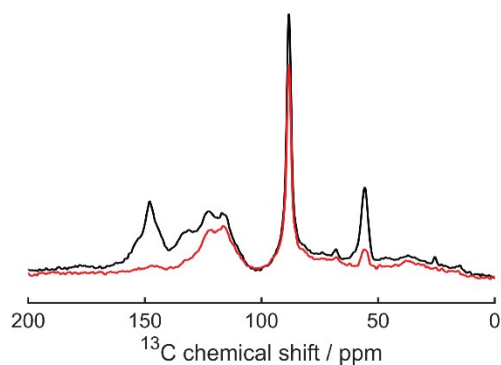

(e) KL-Ph

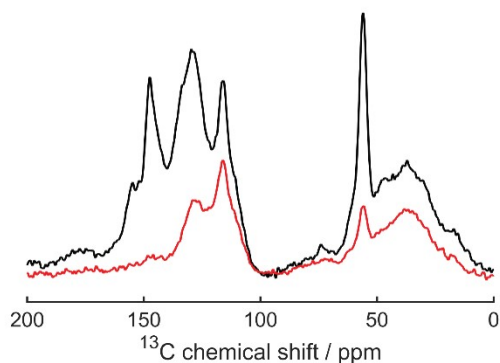

(f) KL-PhBZ-Aniline

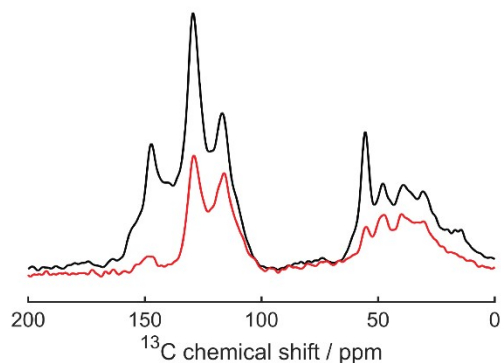

(g) KL-PhBZ-A

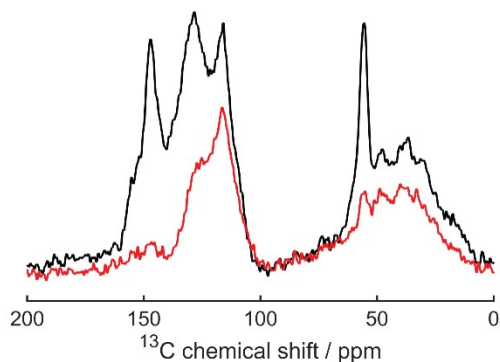

(h) KL-PhBZ-B

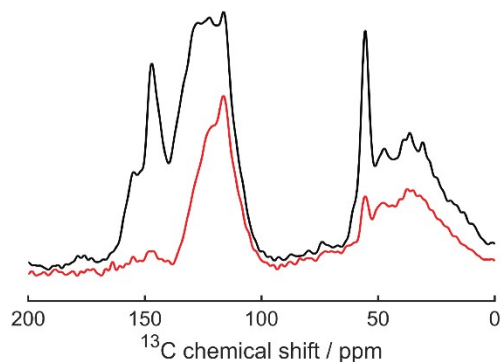

**Figure S18.**  $^{13}\text{C}$  CP MAS NMR spectra of Kraft lignin, functionalised with phenol and/or benzoxazine, detected with a CP contact time of 1 ms (black) and 50  $\mu\text{s}$  (red).

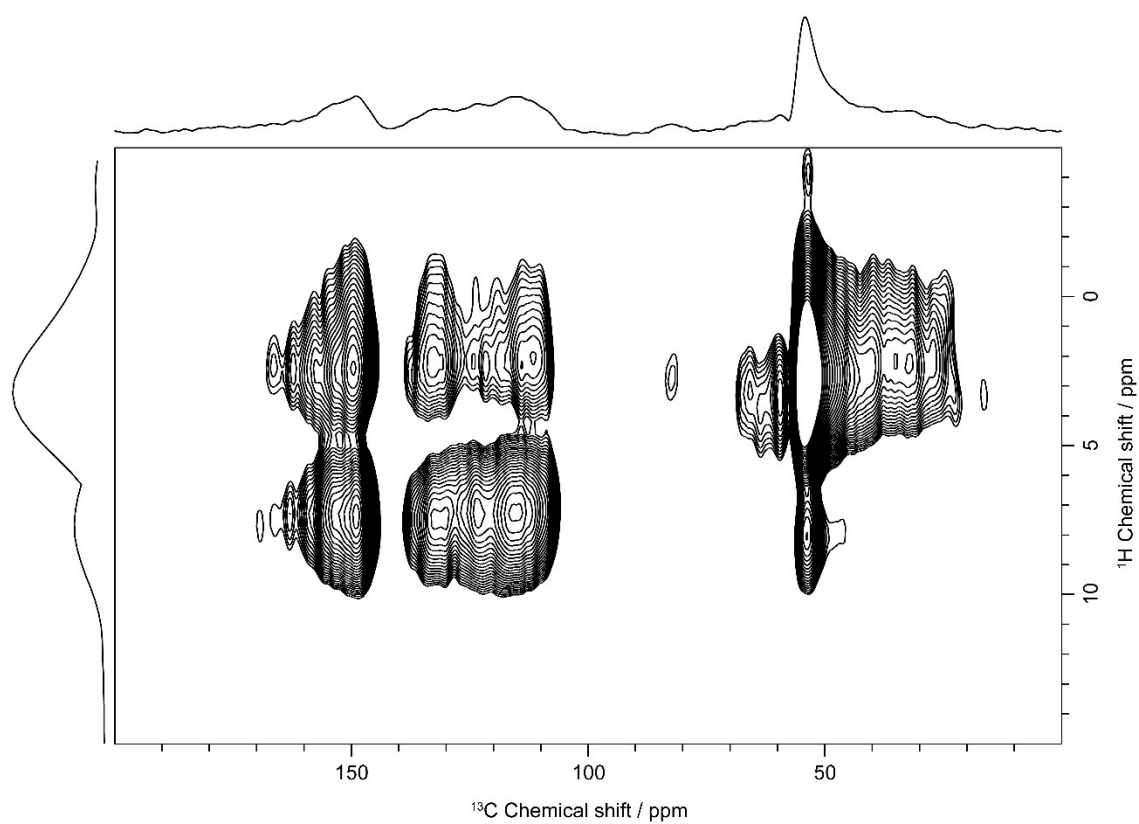

**Figure S19:** 2D  $^1\text{H}$ – $^{13}\text{C}$  HETCOR NMR spectrum of SL lignin, measured with a cross polarisation contact time of 1 ms.

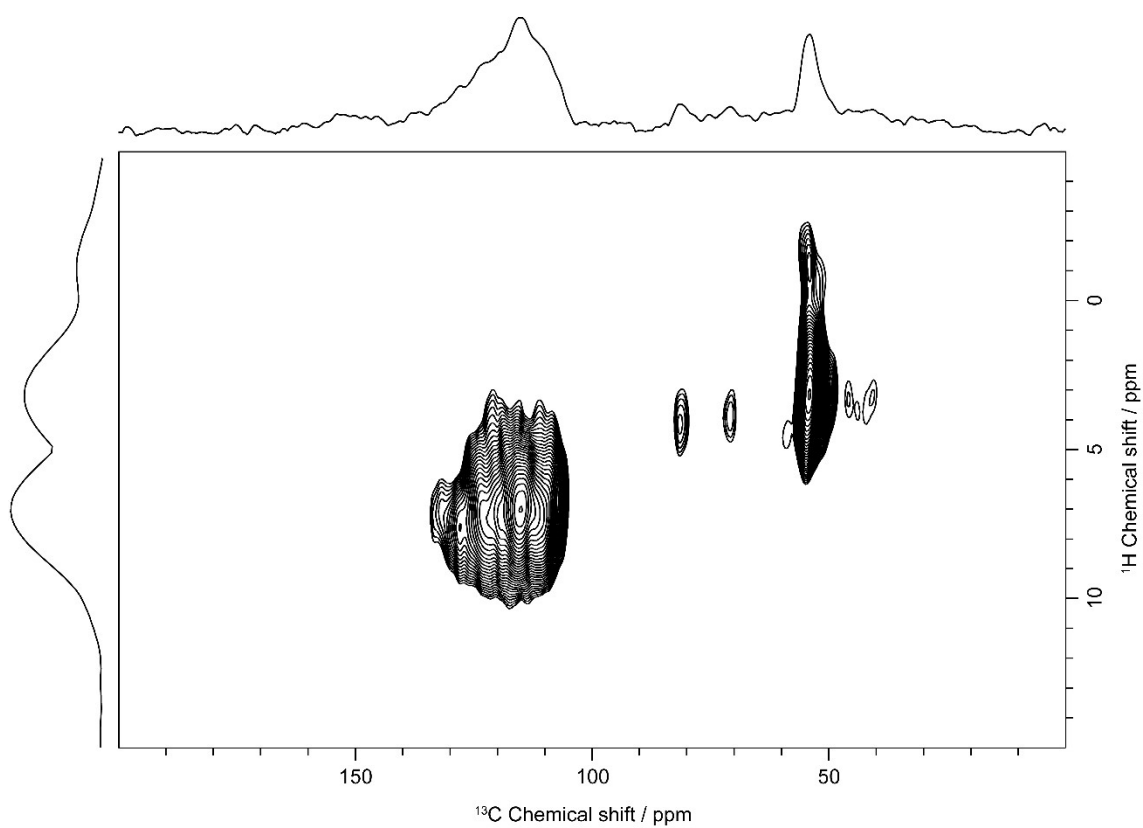

**Figure S20:** 2D  $^1\text{H}$ - $^{13}\text{C}$  HETCOR NMR spectrum of SL lignin, measured with a cross polarisation contact time of 50  $\mu\text{s}$ .

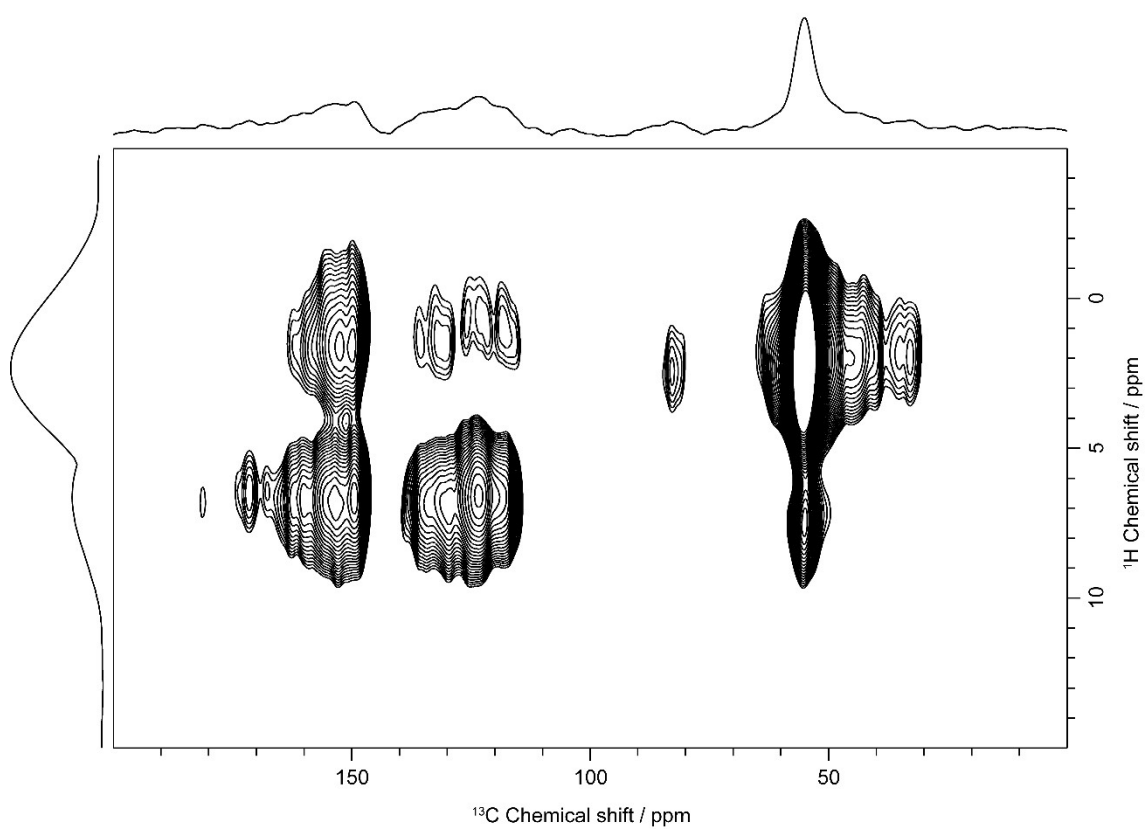

**Figure S21:** 2D  $^1\text{H}$ - $^{13}\text{C}$  HETCOR NMR spectrum of SL-BZ-B lignin, measured with a cross polarisation contact time of 1 ms.

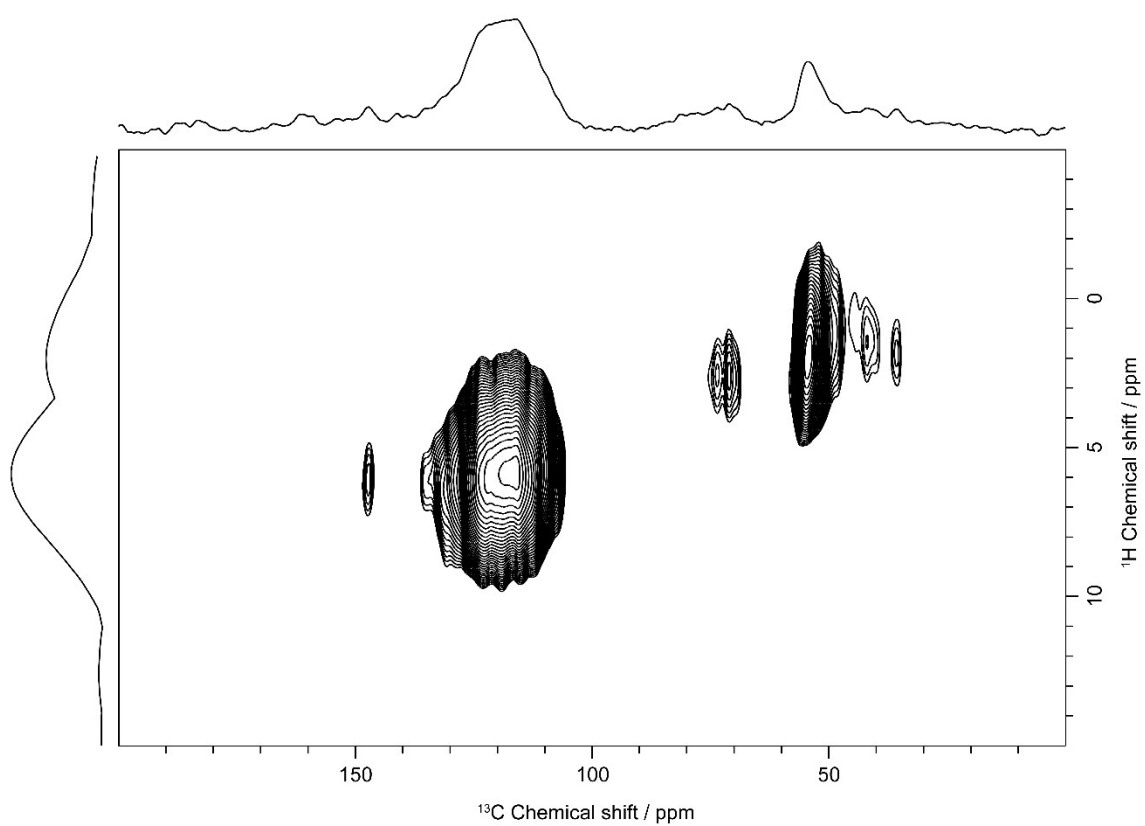

**Figure S22:** 2D  $^1\text{H}$ - $^{13}\text{C}$  HETCOR NMR spectrum of SL-BZ-B lignin, measured with a cross polarisation contact time of 50  $\mu\text{s}$ .
